# Supplementary material
Source: HighWire-hosted journal article supplement (https://bmjopen.bmj.com/content/14/11/e089966)
Supplement: inline-supplementary-material-2 [file inline-supplementary-material-2.xlsx]

## Sheet: Ark1
Project: 50	Publish year	Authors
Cancer: 4
Early- and late-onset posttransplant lymphoproliferative disorders among adult kidney and liver transplant recipients	2022	Ranya Abdulovski , Dina L Møller , Andreas D Knudsen , Søren S Sørensen , Allan Rasmussen , Susanne D Nielsen , Neval E Wareham
Development and Validation of a Risk Score for Post-Transplant Lymphoproliferative Disorders among Solid Organ Transplant Recipients	2022	Quenia Dos Santos , Neval Ete Wareham , Amanda Mocroft , Allan Rasmussen , Finn Gustafsson , Michael Perch , Søren Schwartz Sørensen , Oriol Manuel , Nicolas J Müller , Jens Lundgren , Joanne Reekie
Neval E Wareham 1, Qiuju Li 2, Henrik Sengeløv 3, Caspar Da Cunha-Bang 4, Finn Gustafsson 4, Carsten Heilman	2019	Neval E Wareham , Qiuju Li , Henrik Sengeløv , Caspar Da Cunha-Bang , Finn Gustafsson , Carsten Heilmann , Michael Perch , Allan Rasmussen , Søren Schwartz Sørensen , Amanda Mocroft , Jens D Lundgren
The clinical utility of PDG PET/CT among solid organ transplant recipients suspected of malignancy or infection	2016	Neval E Wareham , J D Lundgren , C Da Cunha-Bang , F Gustafsson , M Iversen , H H Johannesen , A Kjær , A Rasmussen , H Sengeløv , S S Sørensen , B M Fischer
CMV: 11
Development and Dynamics of Cytomegalovirus UL97 Ganciclovir Resistance Mutations in Transplant Recipients Detected by Next-Generation Sequencing	2021	Isabelle P Lodding , Mette Jørgensen , Marc Bennedbæk , Nikolai Kirkby , Klaudia Naegele , Finn Gustafsson , Michael Perch , Allan Rasmussen , Henrik Sengeløv , Søren S Sørensen , Hans H Hirsch , Jens D Lundgren
Evaluation of an electronic, patient-focused management system aimed at preventing cytomegalovirus disease following solid organ transplantation	2020	Christina Ekenberg , Caspar da Cunha-Bang # , Isabelle P Lodding , Søren S Sørensen , Henrik Sengeløv , Michael Perch , Allan Rasmussen , Finn Gustafsson , Neval E Wareham , Nikolai Kirkby , Jesper Kjaer , Marie Helleberg , Joanne Reekie , Jens D Lundgren
Absolute Lymphocyte Count as a Predictor of Cytomegalovirus (CMV) Infection and Recurrence in Hematopoietic Stem Cell Transplant (HSCT) Recipients	2020	Joanne Reekie, PhD, Marie Helleberg, MD, PhD, DMSc, Christina Ekenberg, MD, PhD, Mark P Khurana, MD, Isabelle P Lodding, MD, PhD, Amanda Mocroft, PhD, Jens Lundgren, MD, DMSc, and Henrik Sengeløv, MD, DMSc
Definitions of Resistant and Refractory Cytomegalovirus Infection and Disease in Transplant Recipients for Use in Clinical Trials	2019	Roy F Chemaly, Sunwen Chou, Hermann Einsele, Paul Griffiths, Robin Avery, Raymund R Razonable, Kathleen M Mullane, Camille Kotton, Jens Lundgren, Takashi E Komatsu, Peter Lischka, Filip Josephson, Cameron M Douglas, Obi Umeh, Veronica Miller, Per Ljungman,, and Resistant Definitions Working Group of the Cytomegalovirus Drug Development Forum
Risk Factors for Failure of Primary (Val)ganciclovir Prophylaxis Against Cytomegalovirus Infection and Disease in Solid Organ Transplant Recipients	2019	Mark P Khurana , Isabelle P Lodding , Amanda Mocroft , Søren S Sørensen , Michael Perch , Allan Rasmussen , Finn Gustafsson , Jens D Lundgren
Impact of CMV PCR Blips in Recipients of Solid Organ and Hematopoietic Stem Cell Transplantation	2018	Isabelle P Lodding , Amanda Mocroft , Caspar da Cunha Bang , Finn Gustafsson , Martin Iversen , Nikolai Kirkby , Michael Perch , Allan Rasmussen , Henrik Sengeløv , Søren S Sørensen , Jens D Lundgren
Cytomegalovirus (CMV) Disease Despite Weekly Preemptive CMV Strategy for Recipients of Solid Organ and Hematopoietic Stem Cell Transplantation	2018	I P Lodding, C da Cunha Bang, S S Sørensen, F Gustafsson, M Iversen, N Kirkby, M Perch, A Rasmussen, H Sengeløv, A Mocroft, and J D Lundgren
Cytomegalovirus Viral Load in Bronchoalveolar Lavage to Diagnose Lung Transplant Associated CMV Pneumonia.	2018	Isabelle Paula Lodding , Hans Henrik Schultz , Jens-Ulrik Jensen , Nikolai Kirkby , Michael Perch , Claus Andersen , Jens D Lundgren , Martin Iversen
Clinical Application of Variation in Replication Kinetics during Episodes of Post-Transplant Cytomegalovirus Infections.	2015	I P Lodding , H Sengeløv , C da Cunha-Bang , M Iversen , A Rasmussen , F Gustafsson , J G Downing , J Grarup , N Kirkby , C M Frederiksen , A Mocroft , S S Sørensen , J D Lundgren ; MATCH Programme Study Group
The time course of development and impact from viral resistance against ganciclovir in cytomegalovirus infection.	2013	C da Cunha-Bang , N Kirkby, M Sønderholm, S S Sørensen, H Sengeløv, M Iversen, A Rasmussen, F Gustafsson, C M Frederiksen, J Kjaer, A Cozzi Lepri, J D Lundgren
Factors associated with the development of cytomegalovirus infection following solid organ transplantation	2011	Caspar da Cunha-Bang , Søren S Sørensen, Martin Iversen, Henrik Sengeløv, Jens G Hillingsø, Allan Rasmussen, Svend A Mortensen, Zoe V Fox, Nikolai S Kirkby, Claus B Christiansen, Jens D Lundgren
Microbiome:5
Impact of Antibiotic Treatment on the Gut Microbiome and its Resistome in Hematopoietic Stem Cell Transplant Recipients	2023	Jens Christian Nørgaard , Mette Jørgensen , Kasper Sommerlund Moestrup , Emma Elizabeth Ilett , Adrian Gabriel Zucco , Ramtin Z Marandi , Marc Noguera Julian , Roger Paredes , Jens D Lundgren , Henrik Sengeløv , Cameron MacPherson
Metabolic Potential of the Gut Microbiome Is Significantly Impacted by Conditioning Regimen in Allogeneic Hematopoietic Stem Cell Transplantation Recipients	2022	Mette Jørgensen , Jens C Nørgaard , Emma E Ilett , Ramtin Z Marandi , Marc Noguera-Julian , Roger Paredes , Daniel D Murray , Jens Lundgren , Cameron Ross MacPherson , Henrik Sengeløv
Pre-Transplant Prediction of Acute Graft-versus-Host Disease Using the Gut Microbiome	2022	Ramtin Zargari Marandi , Mette Jørgensen , Emma Elizabeth Ilett , Jens Christian Nørgaard , Marc Noguera-Julian , Roger Paredes , Jens D Lundgren , Henrik Sengeløv , Cameron Ross MacPherson
Associations of the gut microbiome and clinical factors with acute GVHD in allogeneic HSCT recipients	2020	Emma E Ilett , Mette Jørgensen , Marc Noguera-Julian , Jens Christian Nørgaard , Gedske Daugaard , Marie Helleberg , Roger Paredes , Daniel D Murray , Jens Lundgren , Cameron MacPherson , Joanne Reekie , Henrik Sengeløv
Gut microbiome comparability of fresh-frozen versus stabilized-frozen samples from hospitalized patients using 16S rRNA gene and shotgun	2019	Emma E. Ilett, Mette Jørgensen, Marc Noguera-Julian , Gedske Daugaard, Daniel D. Murray, Marie Helleberg, Roger Paredes ,, Jens Lundgren, Henrik Sengeløv & Cameron MacPherson
Other Infections: 15
Associations between invasive aspergillosis and cytomegalovirus in lung transplant recipients: a nationwide cohort study	2023	Signe Marie Wulff , Michael Perch , Jannik Helweg-Larsen , Pia Bredahl , Maiken Cavling Arendrup , Jens Lundgren , Marie Helleberg , Cornelia Geisler Crone
Prediction of herpes virus infections after solid organ transplantation: a prospective study of immune function	2023	Dina Leth Møller Søren Schwartz Sørensen, Omid Rezahosseini Daniel Bräuner Rasmussen Nicoline Stender Arentoft Josefine Amalie Loft Michael Perch, Finn Gustafsson, Jens Lundgren, Thomas Scheike Jenny Dahl Knudsen Sisse Rye Ostrowski, Allan Rasmussen Susanne Dam Nielsen
Achromobacter spp. in a Cohort of Non-Selected Pre- and Post-Lung Transplant Recipients	2022	Cornelia Geisler Crone , Omid Rezahosseini , Hans Henrik Lawaetz Schultz , Tavs Qvist , Helle Krogh Johansen , Susanne Dam Nielsen , Michael Perch
Adverse Events Associated with Universal versus Targeted Antifungal Prophylaxis among Lung Transplant Recipients-A Nationwide Cohort Study 2010-2019	2022	Cornelia Geisler Crone , Signe Marie Wulff , Jannik Helweg-Larsen , Pia Bredahl , Maiken Cavling Arendrup , Michael Perch , Marie Helleberg
Incidence and Impact of Parvovirus B19 Infection in Seronegative Solid Organ Transplant Recipients	2021	Omid Rezahosseini , Christina Ekenberg , Dina Leth Møller , Søren Schwartz Sørensen , Neval Ete Wareham , Michael Perch , Finn Gustafsson , Allan Rasmussen , Nikolai Kirkby , Joanne Reekie , Jens Lundgren , Susanne Dam Nielsen
Bacterial and fungal bloodstream infections in solid organ transplant recipients: results from a Danish cohort with nationwide follow-up	2021	Dina Leth Møller , Søren Schwartz Sørensen , Michael Perch , Finn Gustafsson , Omid Rezahosseini , Andreas Dehlbæk Knudsen , Thomas Scheike , Jenny Dahl Knudsen , Jens Lundgren , Allan Rasmussen , Susanne Dam Nielsen
An Observational Prospective Cohort Study of Incidence and Outcome of Streptococcus pneumoniae and Hemophilus influenzae Infections in Adult Solid Organ Transplant Recipients	2021	Omid Rezahosseini , Dina Leth Møller , Søren Schwartz Sørensen , Michael Perch , Finn Gustafsson , Marco Gelpi , Jenny Knudsen , Marie Helleberg , Allan Rasmussen , Susanne Dam Nielsen , Zitta Barrella Harboe
Pneumocystis jirovecii pneumonia in liver transplant recipients in an era of routine prophylaxis	2021	Philip B Andreasen , Omid Rezahosseini , Dina L Møller , Neval E Wareham , Magda T Thomsen , Ranya Houmami , Andreas D Knudsen , Jenny Knudsen , Jørgen A L Kurtzhals , Andreas A Rostved , Christian R Pedersen , Allan Rasmussen , Susanne D Nielsen
Bacterial and fungal bloodstream infections in pediatric liver and kidney transplant recipients	2021	Dina Leth Møller , Søren Schwartz Sørensen , Neval Ete Wareham , Omid Rezahosseini , Andreas Dehlbæk Knudsen , Jenny Dahl Knudsen , Allan Rasmussen , Susanne Dam Nielsen
Measles, Mumps, Rubella, and Varicella Zoster Virus Serology and Infections in Solid Organ Transplant Recipients During the First Year Posttransplantation	2021	Omid Rezahosseini , Søren Schwartz Sørensen , Michael Perch , Christina Ekenberg , Dina Leth Møller , Andreas Dehlbæk Knudsen , Nikolai Kirkby , Jens Lundgren , Isabelle P Lodding , Neval Ete Wareham , Finn Gustafsson , Allan Rasmussen , Susanne Dam Nielsen
Tuberculosis among Patients Undergoing Solid Organ Transplantation or Dialysis in a Low-Endemic Country, 2004-2017	2020	Marie Helleberg , Daniel Cho , Christina Ekenberg , Søren Sørensen , Marianne Rix , Finn Gustafsson , Allan Rasmussen , Michael Perch , Peter H S Andersen , Jens D Lundgren , Aase Bengaard Andersen
Incidence Rates and Risk Factors of Clostridioides difficile Infection in Solid Organ and Hematopoietic Stem Cell Transplant Recipients	2019	Emma E Ilett , Marie Helleberg , Joanne Reekie , Daniel D Murray , Signe M Wulff , Mark P Khurana , Amanda Mocroft , Gedske Daugaard , Michael Perch , Allan Rasmussen , Søren S Sørensen , Finn Gustafsson , Niels Frimodt-Møller , Henrik Sengeløv , Jens Lundgren
The value of EBV DNA in early detection of post-transplant lymphoproliferative disorders among solid organ and hematopoietic stem cell transplant recipients.	2018	Neval E Wareham, Amanda Mocroft, Henrik Sengeløv, Caspar Da Cunha-Bang, Finn Gustafsson, Carsten Heilmann, Martin Iversen, Nikolai S Kirkby, Allan Rasmussen, Søren Schwartz Sørensen, Jens D Lundgren, MATCH in PERSIMUNE study group
Renal Dysfunction in a Cohort of Renal Transplant Recipients: Impact of BK Polyomavirus	2017	Álvaro H Borges, MD, MSc, PhD, Alessandro Cozzi-Lepri, PhD, Hans H Hirsch, MD, MSc, Caspar Da Cunha-Bang, MD, PhD, Neval Ete Wareham, MD, Casper Møller Frederiksen, MSc, PhD, Amanda Mocroft, MSc, Jens Lundgren, MD, DMSc, Søren Schwartz Sørensen, MD, DMSc, MATCH Program Study Group
Risk of infectious diseases among first-degree relatives of transplant recipients who develop CMV infection: is the infectious phenotype inheritable?	2017	C Ekenberg , I P Lodding , N E Wareham , S S Sørensen , H Sengeløv , F Gustafsson , A Rasmussen , M Perch , J D Lundgren , M Helleberg
Other: 8
Pretransplantation Plasma ST2 Level as a Prognostic Biomarker of 1-Year Nonrelapse Mortality in Allogeneic Hematopoietic Cell Transplantation	2023	Lars Klingen Gjærde , Sisse Rye Ostrowski , Frederikke Schierbeck , Niels Smedegaard Andersen , Lone Smidstrup Friis , Brian Kornblit , Søren Lykke Petersen , Ida Schjødt , Henrik Sengeløv
Post-Transplantation Anemia and Risk of Death Following Lung Transplantation	2022	Terese Brun Bugge , Michael Perch , Omid Rezahosseini , Cornelia Geisler Crone , Kristine Jensen , Hans Henrik Schultz , Pia Bredahl , Mads Hornum , Susanne Dam Nielsen , Thomas Kromann Lund
Functional immune reconstitution early after allogeneic haematopoietic cell transplantation: A comparison of pre- and post-transplantation cytokine responses in stimulated whole blood	2021	Lars Klingen Gjaerde , Patrick Terrence Brooks , Niels Smedegaard Andersen , Lone Smidstrup Friis , Brian Kornblit , Søren Lykke Petersen , Ida Schjødt , Susanne Dam Nielsen , Sisse Rye Ostrowski , Henrik Sengeløv
Immune function as predictor of infectious complications and clinical outcome in patients undergoing solid organ transplantation (the ImmuneMo:SOT study): a prospective non-interventional observational trial	2019	Camilla Heldbjerg Drabe , Søren Schwartz Sørensen , Allan Rasmussen , Michael Perch , Finn Gustafsson , Omid Rezahosseini , Jens D Lundgren , Sisse Rye Ostrowski , Susanne Dam Nielsen
Improved Overall Survival, Relapse-Free-Survival, and Less Graft-vs.-Host-Disease in Patients With High Immune Reconstitution of TCR Gamma Delta Cells 2 Months After Allogeneic Stem Cell Transplantation	2019	Lia Minculescu , Hanne Vibeke Marquart , Lars Peter Ryder , Niels Smedegaard Andersen , Ida Schjoedt , Lone Smidstrup Friis , Brian Thomas Kornblit , Søren Lykke Petersen , Eva Haastrup , Anne Fischer-Nielsen , Joanne Reekie , Henrik Sengelov
Extracorporeal photopheresis is a valuable treatment option in steroid-refractory or steroid-dependent acute graft versus host disease-experience with three different approaches	2018	Marietta Nygaard , Tonny Karlsmark , Niels Smedegaard Andersen , Ida Marianne Schjødt , Søren Lykke Petersen , Lone Smidstrup Friis , Brian Thomas Kornblit , Henrik Sengeløv
C-Reactive Protein Levels at Diagnosis of Acute Graft-versus-Host Disease Predict Steroid-Refractory Disease, Treatment-Related Mortality, and Overall Survival after Allogeneic Hematopoietic Stem Cell Transplantation.	2018	Lia Minculescu , Brian Thomas Kornblit , Lone Smidstrups Friis , Ida Schiødt , Soeren Lykke Petersen , Niels Smedegaard Andersen , Henrik Sengeloev
MELD score measured day 10 after orthotopic liver transplantation predicts death and re-transplantation within the first year	2016	Andreas A Rostved , Jens D Lundgren , Jens Hillingsø , Lars Peters , Amanda Mocroft , Allan Rasmussen
CLASS: 3
Trends in underlying causes of death in solid organ transplant recipients between 2010 and 2020: Using the CLASS method for determining specific causes of death	2022	Andreas Søborg, Joanne Reekie , Allan Rasmussen , Caspar Da Cunha-Bang , Finn Gustafsson , Kasper Rossing , Michael Perch , Paul S. Krohn , Søren S. Sørensen , Thomas K. Lund , Vibeke R. Sørensen , Christina Ekenberg , Louise Lundgren , Isabelle P. Lodding , Kasper S. Moestrup , Jens D. Lundgren, , Neval E. Wareham
Posttransplantation Diabetes Mellitus Among Solid Organ Recipients in a Danish Cohort	2022	Quenia Dos Santos , Mads Hornum , Cynthia Terrones-Campos , Cornelia Geisler Crone , Neval Ete Wareham , Andreas Soeborg , Allan Rasmussen , Finn Gustafsson , Michael Perch , Soeren Schwartz Soerensen , Jens Lundgren , Bo Feldt-Rasmussen , Joanne Reekie
Classification of death causes after transplantation (CLASS): Evaluation of methodology and initial results	2018	Neval Ete Wareham , Caspar Da Cunha-Bang, Álvaro H Borges, Christina Ekenberg, Jan Gerstoft, Finn Gustafsson, Ditte Hansen, Carsten Heilmann, Marie Helleberg, Jens Hillingsø, Paul Suno Krohn, Isabelle Paula Lodding, Thomas Kromann Lund, Louise Lundgren, Amanda Mocroft, Michael Perch, Søren Lykke Petersen, Irma Petruskevicius, Allan Rasmussen, Kasper Rossing, Andreas A Rostved, Henrik Sengeløv, Vi…
Vitamins: 4
Hyaluronic Acid Is a Biomarker for Allograft Dysfunction and Predicts 1-Year Graft Loss After Liver Transplantation	2018	A A Rostved , S R Ostrowski , L Peters , J D Lundgren , J Hillingsø , P I Johansson , A Rasmussen
Vitamin E and acute graft-versus-host disease after myeloablative allogeneic hematopoietic cell transplantation	2020	Lars Klingen Gjaerde , Sisse Rye Ostrowski , Lia Minculescu , Niels Smedegaard Andersen , Lone Smidstrup Friis , Brian Kornblit , Søren Lykke Petersen , Ida Schjødt , Henrik Sengeløv
Pretransplantation vitamin A plasma levels and risk of acute graft-versus-host disease following allogeneic hematopoietic stem cell transplantation	2020	Lars K Gjærde , Niels S Andersen , Lone S Friis , Brian Kornblit , Søren L Petersen , Ida Schjødt , Sisse R Ostrowski , Henrik Sengeløv
Pre-transplantation plasma vitamin D levels and acute graft-versus-host disease after myeloablative hematopoietic cell transplantation in adults	2021	Lars Klingen Gjærde , Sisse Rye Ostrowski , Niels Smedegaard Andersen , Lone Smidstrup Friis , Brian Kornblit , Søren Lykke Petersen , Ida Schjødt , Henrik Sengeløv
